# Supplementary material for: Two-dimensional nitrides as highly efficient potential candidates for CO2 capture and activation
Source: Royal Society of Chemistry journal article supplement (doi:10.1039/c8cp02746c), 2018-01-01
Supplement: c8cp02746c1.pdf [file c8cp02746c1.pdf]

## Electronic Supplementary Information (ESI)

# Two-Dimensional Nitrides as Highly Efficient Potential Candidates for CO<sub>2</sub> Capture and Activation

Raul Morales-Salvador, Ángel Morales-García, Francesc Viñes and Francesc Illas\*

*Departament de Ciència de Materials i Química Física & Institut de Química Teòrica i Computacional (IQTCUB), Universitat de Barcelona, c/ Martí i Franquès 1, 08028 Barcelona, Spain*

*e-mail:* [francesc.illas@ub.edu](mailto:francesc.illas@ub.edu)

### Table of Contents

|                                                                                      |          |
|--------------------------------------------------------------------------------------|----------|
| <b>1. Interaction of CO<sub>2</sub> with Nitride MXenes</b>                          | <b>2</b> |
| <b>2. Effect of Dispersion in the Adsorption of CO<sub>2</sub> on Nitride MXenes</b> | <b>3</b> |
| <b>3. Adsorption/Desorption Temperatures</b>                                         | <b>4</b> |
| <b>4. Quantitative Adsorption of CO<sub>2</sub> by Nitride MXenes</b>                | <b>5</b> |

## 1. Interaction of CO<sub>2</sub> with Nitride MXenes

Table S1 compiles the value of the adsorption energy of CO<sub>2</sub> on MXene surfaces along with the C-O and M-O bond lengths,  $\delta(\text{CO})$  and  $\delta(\text{MO})$ , respectively, the CO<sub>2</sub> molecular angle  $\alpha(\text{OCO})$ , and the Bader charge difference ( $\Delta Q$ ) between the adsorbed and isolated CO<sub>2</sub> molecule. The information is presented itemized per site as shown in Fig. 1. Note that calculations show a surface-bound anionic CO<sub>2</sub><sup>δ-</sup> species with bent geometry (see  $\alpha(\text{OCO})$  and  $\Delta Q$  indicators in Table S1). Several studies have evidenced the key role of this activated mode with the further reaction of CO<sub>2</sub>.<sup>1</sup> Previous studies have shown that experimental findings are compatible with the formation of the metastable CO<sub>2</sub><sup>δ-</sup> with a bent geometry.<sup>2</sup> The bent anionic structure has larger C-O distances, 1.25-1.44 Å, than the isolated and neutral molecule, 1.16 Å. Our structural analysis reported in Table S1 indicates the formation of CO<sub>2</sub><sup>δ-</sup> once the molecule is adsorbed, being consistent with the previous studies.<sup>4</sup>

**Table S1** Adsorption energy (in eV) of CO<sub>2</sub> molecule on MXene carbides at PBE and PBE-D3 levels on the adsorption sites described in Fig. 1. Bond lengths  $\delta(\text{CO})$  and  $\delta(\text{MO})$  are given in Å, as well as the CO<sub>2</sub> molecular angle,  $\alpha(\text{OCO})$ , in degrees. The Bader charge analysis,  $\Delta Q$ , are given in *e* and corresponds to charge difference between the adsorbed and isolated CO<sub>2</sub> molecule. The (×2) term indicates that the bond distances are identical.

| MXene                                                                    | Level  | $E_{\text{ads}}^a$ | $\delta(\text{MO})$ | $\delta(\text{CO})$ | $\alpha(\text{OCO})$ | $\Delta Q$ |
|--------------------------------------------------------------------------|--------|--------------------|---------------------|---------------------|----------------------|------------|
| <b><math>\eta^1\text{-CO}_2\text{-}\mu^2\text{-C}_B</math></b>           |        |                    |                     |                     |                      |            |
| Cr <sub>2</sub> N                                                        | PBE    | -0.30              | 2.10 (×2)           | 1.26 (×2)           | 136.8                | -0.89      |
|                                                                          | PBE-D3 | -1.30              | 2.10 (×2)           | 1.26 (×2)           | 136.8                | -0.90      |
| Hf <sub>2</sub> N                                                        | PBE    | -2.02              | 2.18 (×2)           | 1.29(×2)            | 130.1                | -1.47      |
|                                                                          | PBE-D3 | -2.29              | 2.18 (×2)           | 1.29(×2)            | 129.9                | -1.47      |
| Nb <sub>2</sub> N                                                        | PBE    | -1.17              | 2.24 (×2)           | 1.27 (×2)           | 132.6                | -1.11      |
|                                                                          | PBE-D3 | -1.73              | 2.23 (×2)           | 1.27 (×2)           | 132.4                | -1.12      |
| Ta <sub>2</sub> N                                                        | PBE    | -1.28              | 2.16 (×2)           | 1.28 (×2)           | 132.4                | -1.20      |
|                                                                          | PBE-D3 | -1.90              | 2.16 (×2)           | 1.28 (×2)           | 132.4                | -1.21      |
| V <sub>2</sub> N                                                         | PBE    | -0.97              | 2.11 (×2)           | 1.27 (×2)           | 134.6                | -1.08      |
|                                                                          | PBE-D3 | -1.67              | 2.10 (×2)           | 1.27 (×2)           | 134.6                | -1.08      |
| Mo <sub>2</sub> N                                                        | PBE    | -0.74              | 2.24 (×2)           | 1.26 (×2)           | 136.2                | -1.06      |
|                                                                          | PBE-D3 | -1.34              | 2.23 (×2)           | 1.26 (×2)           | 136.2                | -1.06      |
| W <sub>2</sub> N                                                         | PBE    | -0.40              | 2.22 (×2)           | 1.26 (×2)           | 136,8                | -0.86      |
|                                                                          | PBE-D3 | -1.21              | 2.22 (×2)           | 1.26 (×2)           | 136,7                | -0.86      |
| <b><math>\eta^2\text{-CO}_2\text{-}\mu^3\text{-C}_M\text{O}_B</math></b> |        |                    |                     |                     |                      |            |
| Nb <sub>2</sub> N                                                        | PBE    | -1.13              | 2.40; 2.39          | 1.26;1.33           | 130.8                | -1.35      |
|                                                                          | PBE-D3 | -1.69              | 2.39 (×2)           | 1.26;1.33           | 130.9                | -1.35      |
| V <sub>2</sub> N                                                         | PBE    | -0.94              | 2.25;2.24           | 1.26;1.32           | 133.1                | -1.30      |
|                                                                          | PBE-D3 | -1.65              | 2.23;2.25           | 1.26;1.32           | 133.1                | -1.30      |
| Mo <sub>2</sub> N                                                        | PB3    | -0.44              | 2.36;2.36           | 1.26;1.30           | 134.7                | -1.39      |
|                                                                          | PB3-D3 | -1.03              | 2.35;2.36           | 1.26;1.30           | 134.7                | -1.39      |
| <b><math>\eta^2\text{-CO}_2\text{-}\mu^3\text{-C}_N\text{O}_B</math></b> |        |                    |                     |                     |                      |            |
| Cr <sub>2</sub> N                                                        | PBE    | -0.21              | 2.22;2.18           | 1.25;1.31           | 135.0                | -1.12      |
|                                                                          | PBE-D3 | -1.21              | 2.22;2.17           | 1.25;1.31           | 135.0                | -1.14      |

|                                                                                    |        |       |               |           |        |       |
|------------------------------------------------------------------------------------|--------|-------|---------------|-----------|--------|-------|
| Nb <sub>2</sub> N                                                                  | PBE    | -0.93 | 2.39;2.36     | 1.26;1.33 | 132.1  | -1.34 |
|                                                                                    | PBE-D3 | -1.50 | 2.39;2.36     | 1.26;1.33 | 132.2  | -1.35 |
| V <sub>2</sub> N                                                                   | PBE    | -0.80 | 2.26;2.21     | 1.26;1.32 | 133.9  | -1.32 |
|                                                                                    | PBE-D3 | -1.51 | 2.25;2.21     | 1.26;1.33 | 134.0  | -1.32 |
| <b><math>\eta^3\text{-CO}_2\text{-}\mu^5\text{-C}_M\text{O}_N\text{O}_N</math></b> |        |       |               |           |        |       |
| Zr <sub>2</sub> N                                                                  | PBE    | -2.62 | 2.34 ; 2.35   | 1.36 (x2) | 116.2  | -1.79 |
|                                                                                    | PBE-D3 | -2.97 | 2.34 ; 2.35   | 1.36;1.37 | 116.2  | -1.80 |
| Hf <sub>2</sub> N                                                                  | PBE    | -2.68 | 2.32 ; 2.33   | 1.35;1.44 | 114.0  | -2.02 |
|                                                                                    | PBE-D3 | -2.97 | 2.22;2.33     | 1.35;1.44 | 114.0  | -2.02 |
| Ti <sub>2</sub> N                                                                  | PBE    | -2.62 | 2.23 (x2)     | 1.40;1.36 | 115.9  | -1.86 |
|                                                                                    | PBE-D3 | -3.13 | 2.23;2.19     | 1.40;1.36 | 115.9  | -1.87 |
| <b><math>\eta^3\text{-CO}_2\text{-}\mu^5\text{-C}_N\text{O}_M\text{O}_M</math></b> |        |       |               |           |        |       |
| Ta <sub>2</sub> N                                                                  | PBE    | -1.26 | 2.00(x2)      | 1.38 (x2) | 112.8  | -1.65 |
|                                                                                    | PBE-D3 | -1.90 | 2.00(x2)      | 1.38 (x2) | 112.8  | -1.65 |
| W <sub>2</sub> N                                                                   | PBE    | -0.94 | 2.00 (x2)     | 1.37 (x2) | 114.0  | -1.40 |
|                                                                                    | PBE-D3 | -1.77 | 2.00 (x2)     | 1.37 (x2) | 114.0  | -1.40 |
| Ti <sub>2</sub> N                                                                  | PBE    | -2.62 | 2.20;2.14(x2) | 1.39;1.40 | 115.3  | -1.94 |
|                                                                                    | PBE-D3 | -3.13 | 2.20;2.13(x2) | 1.39;1.40 | 115.2  | -1.94 |
| <b><math>\eta^2\text{-CO}_2\text{-}\mu^4\text{-O}_B\text{O}_B</math></b>           |        |       |               |           |        |       |
| Ta <sub>2</sub> N                                                                  | PBE    | +0.05 | 2.10;2.30(x2) | 1.39 (x2) | 106.8  | -1.62 |
|                                                                                    | PBE-D3 | -0.61 | 2.10;2.31     | 1.39 (x2) | 106.8  | -1.63 |
| <b><math>\eta^3\text{-CO}_2\text{-}\mu^4\text{-C}_B\text{O}_B\text{O}_B</math></b> |        |       |               |           |        |       |
| Mo <sub>2</sub> N                                                                  | PBE    | -0.74 | 2.22;2.28     | 1.38;1.36 | 111.2  | -1.81 |
|                                                                                    | PBE-D3 | -1.34 | 2.22;2.28     | 1.38;1.36 | 111.2  | -1.82 |
| Cr <sub>2</sub> N                                                                  | PBE    | -0.41 | 2.09;1.98     | 1.39;1.29 | 121.31 | -1.27 |
|                                                                                    | PBE-D3 | -1.44 | 2.08;1.97     | 1.39;1.29 | 121.33 | -1.28 |
| <b><math>\eta^3\text{-CO}_2\text{-}\mu^4\text{-C}_M\text{O}_M\text{O}_B</math></b> |        |       |               |           |        |       |
| W <sub>2</sub> N                                                                   | PBE    | -1.84 | 2.17;2.04     | 1.33;1.39 | 116.5  | -1.41 |
|                                                                                    | PBE-D3 | -2.59 | 2.17;2.04     | 1.33;1.39 | 116.5  | -1.41 |

<sup>a</sup> ZPE corrected as above stated.

## 2. Effect of Dispersion in the Adsorption of CO<sub>2</sub> on Nitride MXenes

The contribution of dispersion terms becomes significant once the D3 Grimme method is turned on when evaluating the adsorption energy on nitride MXenes. The adsorption energy ( $E_{\text{ads}}$ ) strengthens by 0.7–1.00 eV. Other corrections such as Tkatchenko-Scheffler (TS) and sophisticated surface (*surf*) many-body dispersion energy (MBD) confirm that the effect of dispersion is quite important when MXene nitrides are used as substrates. Table S2 show a detail analysis of the dispersion contribution on T<sub>2</sub>N and V<sub>2</sub>N.

**Table S2**  $E_{\text{ads}}$  of CO<sub>2</sub> on Ti<sub>2</sub>N and V<sub>2</sub>N by using D3, Tkatchenko-Scheffler (TS), and many-body dispersion energy (MBD) methods. Note that ZPE contribution is also considered.

|                   | PBE   | PBE-D3 | PBE-TS | PBE-MBD |
|-------------------|-------|--------|--------|---------|
| Ti <sub>2</sub> N | -2.62 | -3.12  | -3.02  | -3.25   |
| V <sub>2</sub> N  | -0.97 | -1.66  | -1.68  | -1.66   |

### 3. Adsorption/Desorption Temperatures

This adsorption/desorption rate model allows one to calculate the rates for desorption and adsorption of CO<sub>2</sub> on MXene (0001) surfaces. Table S3 reports the range of desorption temperature for each one of the adsorption sites studied (see Fig. 1). The reported temperature range is interpreted as the range in which MXene surface loses its capacity to initially capture and accumulate CO<sub>2</sub> when annealing.

**Table S3** Desorption temperature range ([PBE]–[PBE-D3]) for CO<sub>2</sub> partial pressure ranges for CO<sub>2</sub> partial pressures of 40, 15·10<sup>3</sup>, and 10<sup>5</sup> Pa, which stand for air, exhaust, and desorption situations, respectively. All temperature values are given in K.

| MXene                                                                              | Temperature range |           |            |
|------------------------------------------------------------------------------------|-------------------|-----------|------------|
|                                                                                    | air               | exhaust   | desorption |
| <b><math>\eta^1\text{-CO}_2\text{-}\mu^2\text{-C}_B</math></b>                     |                   |           |            |
| Cr <sub>2</sub> N                                                                  | 137-548           | 171-704   | 186-776    |
| Hf <sub>2</sub> N                                                                  | 884-1004          | 1153-1316 | 1280-1463  |
| Nb <sub>2</sub> N                                                                  | 500-741           | 644-958   | 710-1060   |
| Ta <sub>2</sub> N                                                                  | 524-784           | 666-1004  | 729-1104   |
| V <sub>2</sub> N                                                                   | 416-715           | 532-924   | 585-1023   |
| Mo <sub>2</sub> N                                                                  | 315-559           | 398-718   | 436-791    |
| W <sub>2</sub> N                                                                   | 171-498           | 213-634   | 232-696    |
| <b><math>\eta^2\text{-CO}_2\text{-}\mu^3\text{-C}_M\text{O}_B</math></b>           |                   |           |            |
| Nb <sub>2</sub> N                                                                  | 500-749           | 647-979   | 716-1086   |
| V <sub>2</sub> N                                                                   | 420-730           | 541-952   | 597-1057   |
| Mo <sub>2</sub> N                                                                  | 203-453           | 259-586   | 285-648    |
| <b><math>\eta^2\text{-CO}_2\text{-}\mu^3\text{-C}_N\text{O}_B</math></b>           |                   |           |            |
| Cr <sub>2</sub> N                                                                  | 106-523           | 135-672   | 145-741    |
| Nb <sub>2</sub> N                                                                  | 409-650           | 525-843   | 577-934    |
| V <sub>2</sub> N                                                                   | 354-661           | 454-859   | 499-949    |
| <b><math>\eta^3\text{-CO}_2\text{-}\mu^5\text{-C}_M\text{O}_N\text{O}_N</math></b> |                   |           |            |
| Zr <sub>2</sub> N                                                                  | 1148-1256         | 1482-1625 | 1636-1796  |
| Hf <sub>2</sub> N                                                                  | 1172-1261         | 1492-1631 | 1637-1804  |
| Ti <sub>2</sub> N                                                                  | 1108-1326         | 1430-1716 | 1579-1897  |
| <b><math>\eta^3\text{-CO}_2\text{-}\mu^5\text{-C}_N\text{O}_M\text{O}_M</math></b> |                   |           |            |
| Ta <sub>2</sub> N                                                                  | 507-761           | 638-962   | 694-1053   |
| W <sub>2</sub> N                                                                   | 374-697           | 466-877   | 504-956    |
| Ti <sub>2</sub> N                                                                  | 1114-1339         | 1441-1736 | 1594-1922  |
| <b><math>\eta^2\text{-CO}_2\text{-}\mu^4\text{-O}_B\text{O}_B</math></b>           |                   |           |            |
| Ta <sub>2</sub> N <sup>a</sup>                                                     | 276               | 344       | 377        |
| <b><math>\eta^3\text{-CO}_2\text{-}\mu^4\text{-C}_B\text{O}_B\text{O}_B</math></b> |                   |           |            |
| Mo <sub>2</sub> N                                                                  | 313-531           | 394-669   | 431-729    |
| Cr <sub>2</sub> N                                                                  | 181-579           | 225-734   | 242-803    |
| <b><math>\eta^3\text{-CO}_2\text{-}\mu^4\text{-C}_M\text{O}_M\text{O}_B</math></b> |                   |           |            |
| W <sub>2</sub> N                                                                   | 728-1029          | 919-1305  | 1000-1430  |

<sup>a</sup> Adsorption energy at PBE gives positive values, hence only PBE-D3 temperatures are given

#### 4. Quantitative Adsorption of CO<sub>2</sub> by Nitride MXenes

The effectiveness of the nitride MXene materials is also investigated to quantify the amount of CO<sub>2</sub> adsorbed per MXene amount as mol CO<sub>2</sub>/kg of material, and compared with their carbide counterparts. For this purpose, we assumed that four CO<sub>2</sub> molecules could be simultaneously adsorbed on each one of the MXene surfaces within the employed (3×3) supercell, giving a total of 8 adsorbed CO<sub>2</sub> molecules (upper and bottom layers covered by CO<sub>2</sub>). Table S4 encompasses the estimated CO<sub>2</sub> uptake for the nitride MXene surfaces considered in the present work along with previous computational results for several carbide MXenes,<sup>3</sup> experimental evidences of zeolites, metal-organic-frameworks (MOFs), active carbons, and graphene and derivatives.<sup>4</sup>

**Table S4.** Comparison of CO<sub>2</sub> adsorption capacity of MXene carbides and nitrides with other solid adsorbents: zeolites, MOFs, MgO nanopowders,<sup>5</sup> graphene and graphene derivatives (further details in Ref. 12 and references therein).

| Material                          | CO <sub>2</sub> uptake (mol CO <sub>2</sub> /kg. substrate) |                |
|-----------------------------------|-------------------------------------------------------------|----------------|
|                                   | Nitrides (X=N)                                              | Carbides (X=C) |
| <b>MXene</b>                      |                                                             |                |
| Ti <sub>2</sub> X                 | 7.96                                                        | 8.25           |
| V <sub>2</sub> X                  | 7.56                                                        | 7.80           |
| Cr <sub>2</sub> X                 | 7.41                                                        | -              |
| Zr <sub>2</sub> X                 | 4.48                                                        | 4.57           |
| Nb <sub>2</sub> X                 | 4.40                                                        | 4.49           |
| Mo <sub>2</sub> X                 | 4.27                                                        | 4.36           |
| Hf <sub>2</sub> X                 | 2.38                                                        | 2.41           |
| Ta <sub>2</sub> X                 | 2.35                                                        | 2.37           |
| W <sub>2</sub> X                  | 2.32                                                        | 2.34           |
| <b>Zeolites</b>                   |                                                             |                |
| Ca-X                              |                                                             | 3.36           |
| 13X                               |                                                             | 3.96           |
| <b>MOFs</b>                       |                                                             |                |
| Cu-BTTri-mmen                     |                                                             | 2.38           |
| <b>MgO nanopowders</b>            |                                                             |                |
|                                   |                                                             | 0.92           |
| <b>Graphene &amp; derivatives</b> |                                                             |                |
| a-RGO-750                         |                                                             | 2.18           |
| a-RGO-850                         |                                                             | 2.75           |

## References

---

- (1) H.-J. Freud, M. W. Roberts, *Surf. Sci. Rep.*, 1996, **25**, 225-273.
- (2) D. Schröder, C. A. Schalley, J. N. Harvey, H. Schwarz, *Int. J. Mass Spectrom.*, 1999, **185-187**, 25-35.
- (3) A. Morales-García, A. Fernández-Fernández, F. Viñes, F. Illas, *J. Mater. Chem. A*, 2018, **6**, 3381-3385.
- (4) S. Chowdhury, R. Balasubramanian, *Ind. Eng. Chem. Res.*, 2016, **55**, 7906-7916.
- (5) D. W. Flaherty, N. T. Hahn, D. Ferrer, T. R. Engstrom, P. L. Tanaka, C. B. Mullins, *J. Phys. Chem. C*, 2009, **113**, 12742-12752.
